# Supplementary material for: Targeted Activation of Cystic Fibrosis Transmembrane Conductance Regulator
Source: PubMed Central journal article supplement — Mol Ther. 2019 Jul 15;27(10):1737–48. doi: 10.1016/j.ymthe.2019.07.002 (PMC6822231; doi:10.1016/j.ymthe.2019.07.002), 2019-07-15
Supplement: mmc1.pdf [file mmc1.pdf]

**YMTHE, Volume 27**

## **Supplemental Information**

### **Targeted Activation of Cystic Fibrosis**

### **Transmembrane Conductance Regulator**

**Olga Villamizar, Shafagh A. Waters, Tristan Scott, Sheena Saayman, Nicole Grepo, Ryan Urak, Alicia Davis, Adam Jaffe, and Kevin V. Morris**

## Targeted activation of Cystic Fibrosis Transmembrane Conductance Regulator

**Table S1.** Primers, gRNA sequences and BGas-Gapmer.

| Name                | Sequence (5'-3')           |
|---------------------|----------------------------|
| CFTR F              | CTCATGGGATGTGATTCTTTCGACC  |
| CFTR R              | TTTCTGTCCAGGAGACAGGAGCAT   |
| BGas DRT            | TTGATGGTTAAGCAGCTGGTGCC    |
| BGas F              | GTGCCAGCACAGAATCCCTCAAT    |
| BGas R              | GAATGTTTGCATTTGGTGATCGGG   |
| Beta Actin F        | CACCAACTGGGACGACAT         |
| Beta Actin R        | ACAGCCTGGATAGCAACG         |
| gRNA 3 sequence (+) | GGGCCGGACCAGGCAGCACT       |
| gRNA 3 sequence (-) | AGTGCTGCCTGGTCCGGCCC       |
| BGas Gapmer         | G*T*G*GTATAAAAGATAAT*T*A*T |
| Scramble            | G*A*T*ATATGAATAATGAG*T*A*T |

DRT: Directional Reverse Transcriptase primer

## Supplemental Figure S1

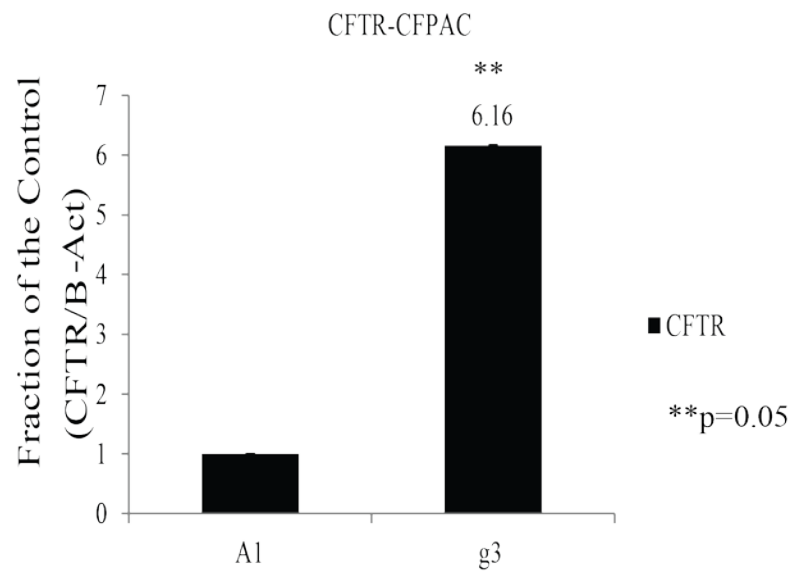

**Figure S1. Activation of CFTR expression by dCas9/VPR.** CFTR promoter directed guide RNA g3, activates CFTR mRNA expression in CFPAC cells with (F508del-CFTR). Experiments were performed in triplicate in cells shown with the standard error of the means and p values from a paired two-sided T-test, \*p 0.01, \*\*p < 0.05

## Supplemental Figure S2

A

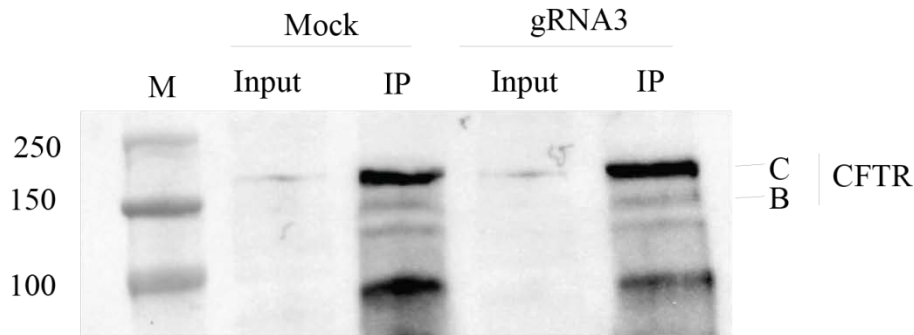

B

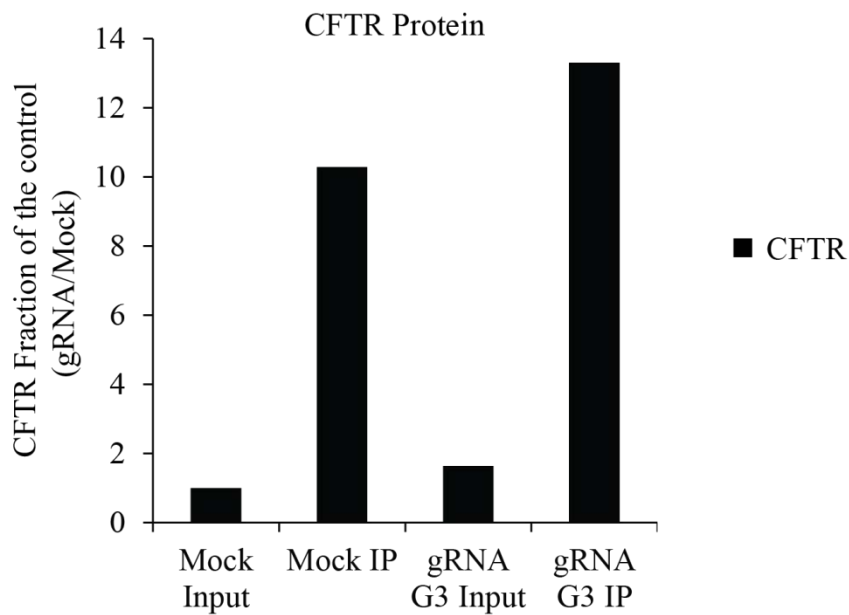

**Figure S2. Activation of CFTR expression by dCas9/VPR.** (A) Western blot (n=1) showing CFTR protein levels increased of the mature form of CFTR (Band C) and small amounts of the immature form of CFTR (band B) after transiently transfection of A549 (WT-CFTR) cells with g3RNA/dcas9-VPR as determined by (B) optical density analysis. Immunoprecipitation (IP).

Supplemental Figure S3

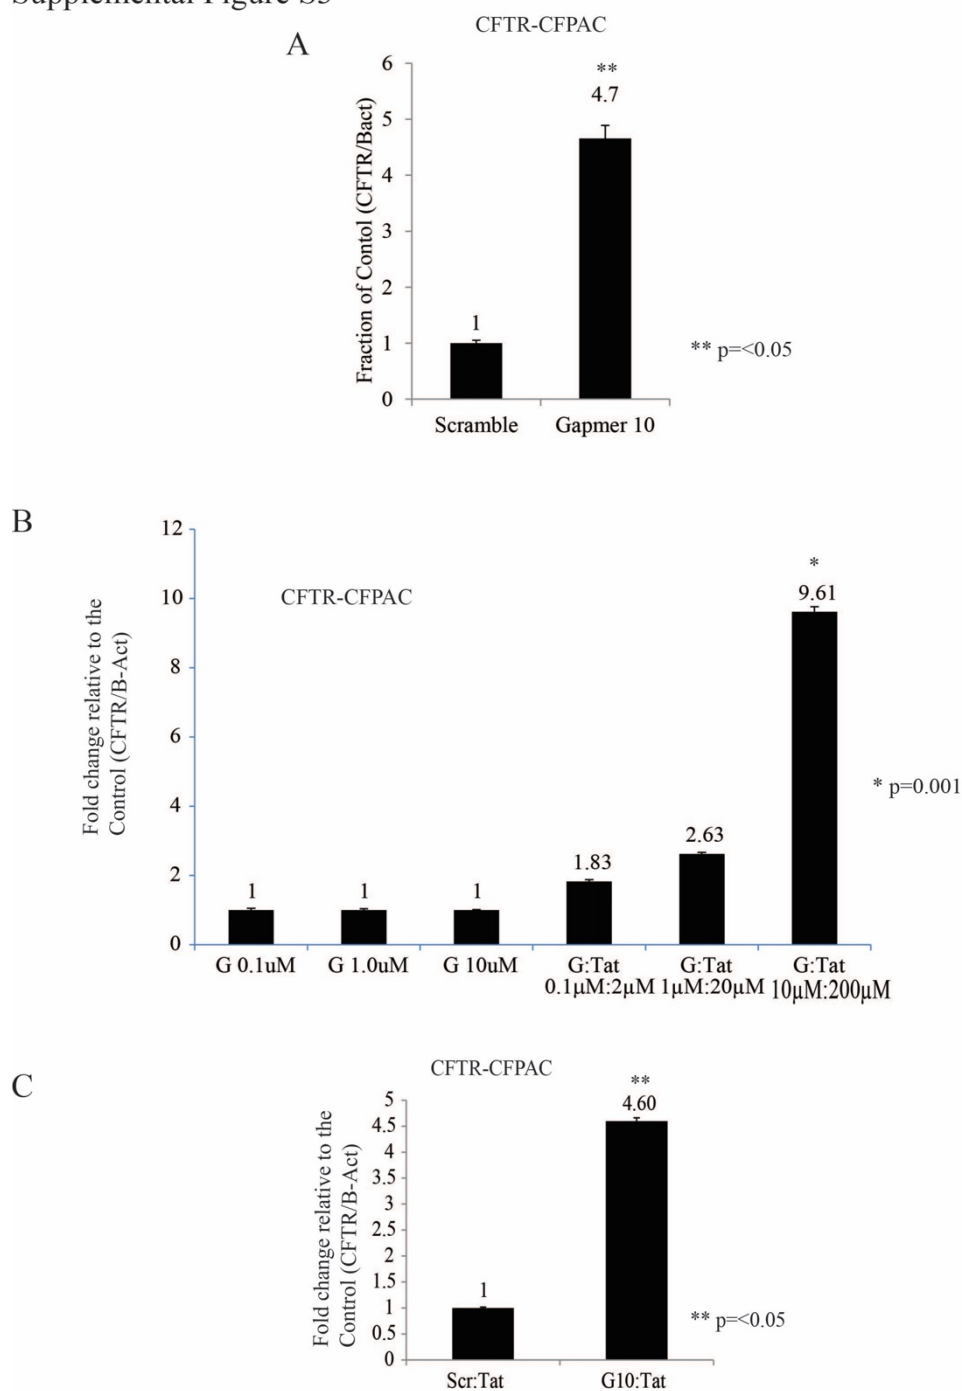

**Figure S3. BGas repression results in increase expression of CFTR** (A) Effect of Gapmer 10 in CFPAC cells. (B) Dose titration of Gapmer-Tat in CFPAC Cells. (C) CFTR expression after treatment with Gapmer-Tat CPP in CFPAC cells. Experiments were performed in triplicate in cells shown with the standard error of the means and p values from a paired two-sided T-test, \*p=0.001, \*\*p < 0.05.

## Supplemental Figure S4

A.

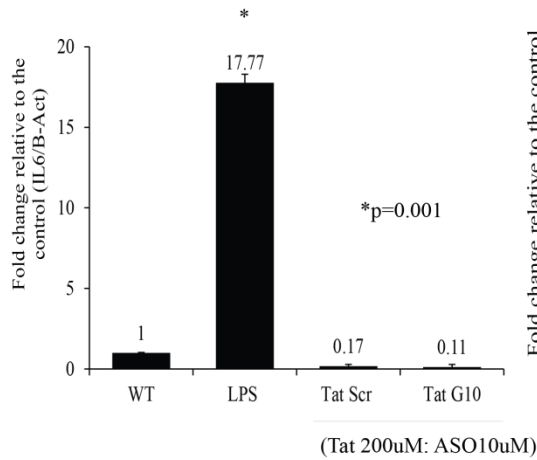

B.

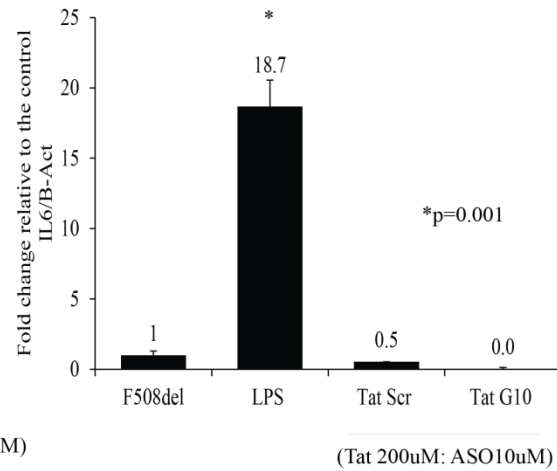

C.

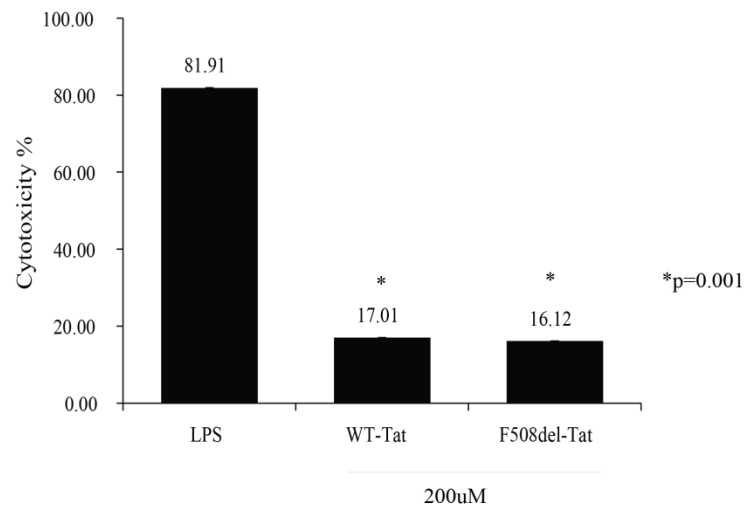

**Figure S4. Immunogenicity and cytotoxicity of Gapmer-Tat CPP particles (A)** IL-6 expression after treatment with Gapmer- Scramble- Tat. **(B)** Cytotoxicity of Tat-CPP. Lipopolysaccharide (LPS)-treated cells as a positive control. Experiments were performed in triplicate in cells shown with the standard error of the means and p values from a paired two-sided T-test, \*p=0.001,

Supplemental Figure S5

A

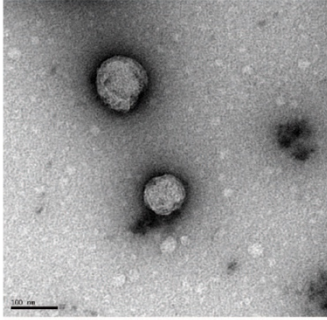

B

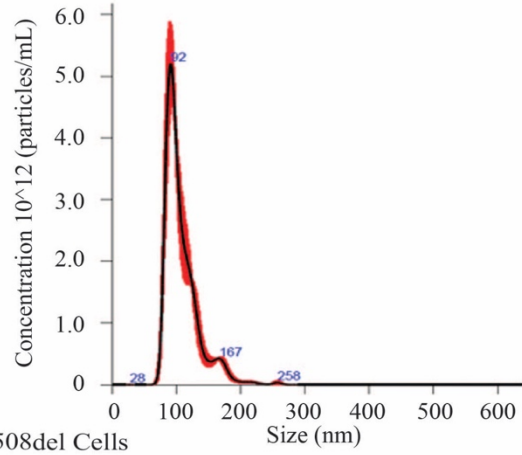

C

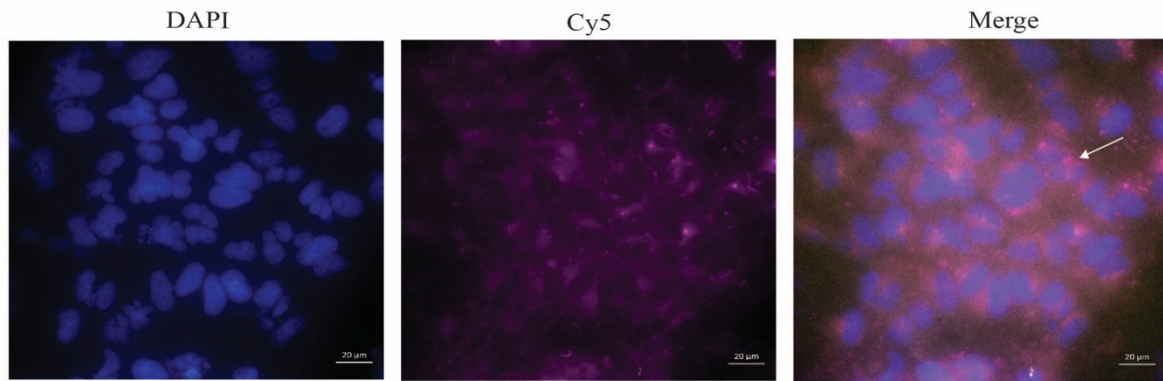

D

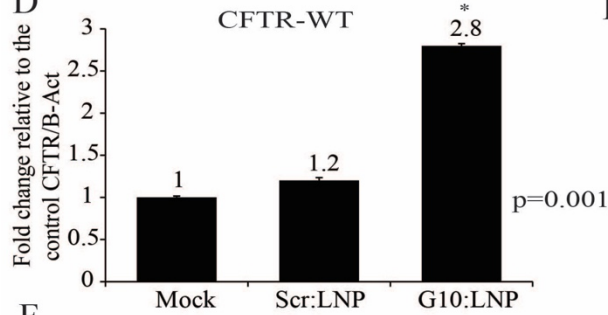

E

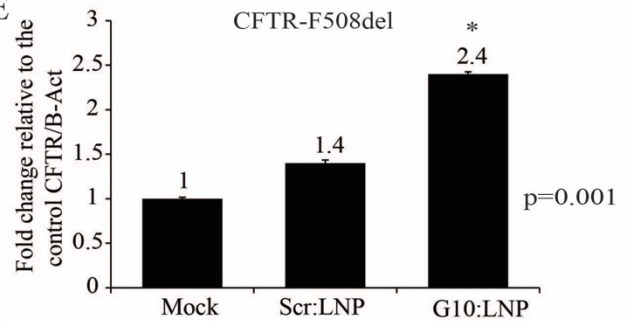

F

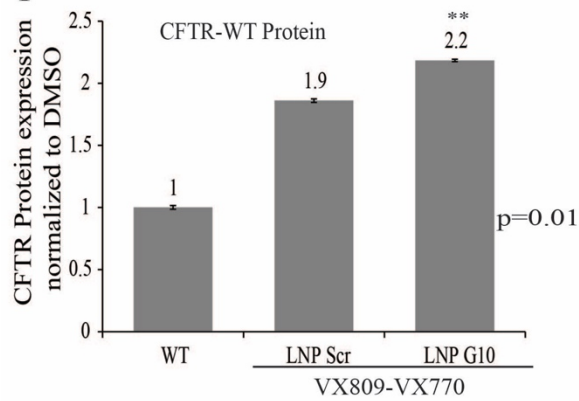

G

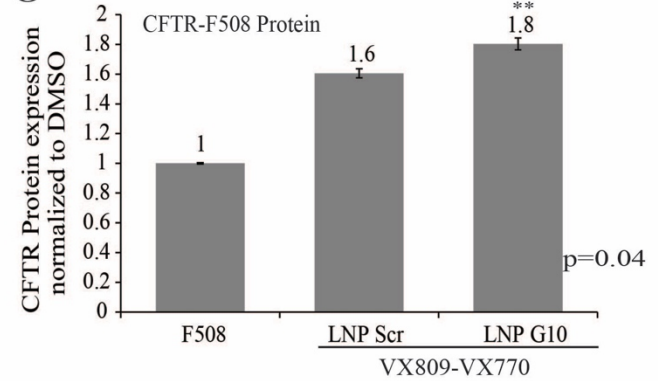

**Figure S5. LNP-mediated delivery of Gapmer enters Human Nasal cells and increase expression of CFTR.** (A) TEM micrographs of LNP measured by using Nanosight NS 300 system. The histogram represents particle size distribution. (B) Light scope analysis of uptake of Gapmer10-Cy5 LNP in to nasal cells. (C-D) qRT-PCR of CFTR mRNA levels in (C) nasal cells from healthy donor WT and (D) nasal cells from CF patient with F508del mutation. (E-F) CFTR ELISA showing CFTR protein levels expression increased after treated with BGas-Gapmer in (E) nasal cells from healthy donor –WT and (F) nasal cells from CF patient with F508del mutation treated with Cy5-Gapmer loaded LNP. Scale bar: 20 $\mu$ m. Experiments were performed in triplicate in cells shown with the standard error of the means and p values from a paired two-sided T-test, \*p=0.001, \*\*p < 0.05.
